# Supplementary material for: Orbital reconstruction: a systematic review and meta-analysis evaluating the role of patient-specific implants
Source: Springer Nature journal article supplement (doi:10.1007/s10006-022-01074-x), 2022-05-20
Supplement: MOESM1 [file 22165596]

## DIPLOPIA

| Study                       | Conventional |       | PSI        |       |
|-----------------------------|--------------|-------|------------|-------|
|                             | Diplopia     | Total | Diplopia   | Total |
| Guo et al                   | 7            | 26    | 3          | 35    |
| Khomutinnikova et al        | 4            | 22    | 2          | 17    |
| Raisian et al               | 0            | 5     | 0          | 5     |
| Zimmerer et al              | 25           | 84    | 15         | 61    |
| Timoshchuk et al            | 6            | 60    | 0          | 24    |
| Kim et al                   | 5            | 38    | 2          | 44    |
| Nkenke et al                | 0            | 10    | 0          | 10    |
| <b>Random effects model</b> | <b>245</b>   |       | <b>196</b> |       |

Heterogeneity:  $I^2 = 0\%$ ,  $\tau^2 = 0.2825$ ,  $p = 0.50$   
 Test for overall effect:  $t_4 = 2.41$  ( $p = 0.07$ )

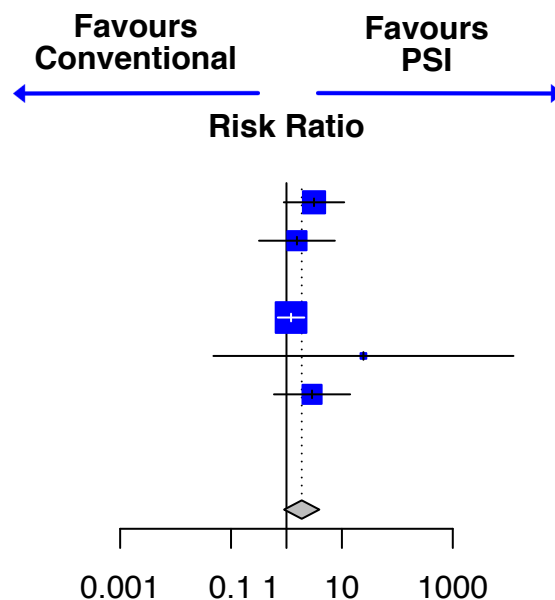

| RR          | 95%–CI              | Weight        |
|-------------|---------------------|---------------|
| 3.14        | [0.90;11.00]        | 22.4%         |
| 1.55        | [0.32;7.47]         | 16.7%         |
|             |                     | 0.0%          |
| 1.21        | [0.70;2.10]         | 42.9%         |
| 24.46       | [0.05; 12428.25]    | 1.5%          |
| 2.89        | [0.60;14.07]        | 16.6%         |
|             |                     | 0.0%          |
| <b>1.89</b> | <b>[0.91; 3.92]</b> | <b>100.0%</b> |

## ENOPHTHALMOS

| Study                       | Conventional |       |        | PSI       |       |        |
|-----------------------------|--------------|-------|--------|-----------|-------|--------|
|                             | Total        | Mean  | SD     | Total     | Mean  | SD     |
| Fan et al                   | 27           | 2.50  | 1.0000 | 29        | 1.00  | 0.5000 |
| Khomutinnikova et al        | 22           | 0.95  | 1.2400 | 17        | 0.46  | 0.8700 |
| Nkenke et al                | 10           | -0.07 | 0.6300 | 10        | -0.39 | 0.5700 |
| Raisian et al               | 5            | 2.40  | 0.8900 | 5         | 0.30  | 0.4500 |
| Scolozzi et al              | 10           | 0.30  | 0.4800 | 10        | 0.50  | 0.7100 |
| <b>Random effects model</b> | <b>74</b>    |       |        | <b>71</b> |       |        |

Heterogeneity:  $I^2 = 82\%$ ,  $t^2 = 1.0606$ ,  $p < 0.01$   
 Test for overall effect:  $t_4 = 1.81$  ( $p = 0.14$ )

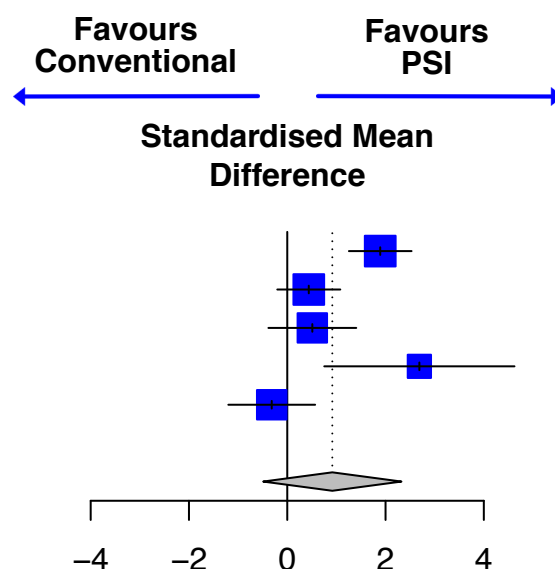

| SMD         | 95%–CI               | Weight        |
|-------------|----------------------|---------------|
| 1.89        | [ 1.25; 2.53]        | 22.7%         |
| 0.44        | [-0.20; 1.08]        | 22.6%         |
| 0.51        | [-0.38; 1.40]        | 20.8%         |
| 2.69        | [ 0.75; 4.62]        | 13.0%         |
| -0.32       | [-1.20; 0.57]        | 20.9%         |
| <b>0.92</b> | <b>[-0.49; 2.32]</b> | <b>100.0%</b> |

## OPERATIVE DURATION

| Study                       | Conventional |        |         | PSI        |        |         |
|-----------------------------|--------------|--------|---------|------------|--------|---------|
|                             | Total        | Mean   | SD      | Total      | Mean   | SD      |
| Fan et al                   | 27           | 95.37  | 22.1900 | 29         | 75.34  | 15.6800 |
| Nkenke et al                | 10           | 65.80  | 14.6000 | 10         | 58.50  | 17.8000 |
| Sigron et al                | 12           | 99.80  | 23.9000 | 10         | 57.30  | 23.5000 |
| Zimmerer et al              | 100          | 127.25 | 61.4300 | 95         | 126.25 | 69.5500 |
| Timoshchuk et al            | 60           | 67.00  | 32.5000 | 24         | 74.30  | 42.5000 |
| <b>Random effects model</b> | <b>209</b>   |        |         | <b>168</b> |        |         |

Heterogeneity:  $I^2 = 82\%$ ,  $t^2 = 0.4719$ ,  $p < 0.01$   
 Test for overall effect:  $t_4 = 1.54$  ( $p = 0.20$ )

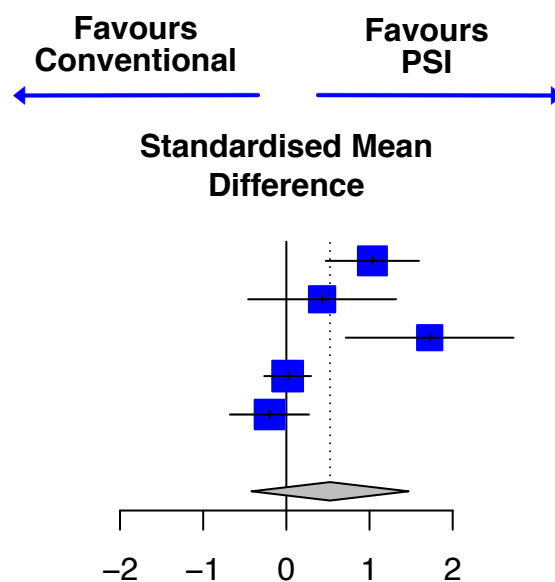

| SMD         | 95%–CI               | Weight        |
|-------------|----------------------|---------------|
| 1.03        | [ 0.47; 1.59]        | 21.1%         |
| 0.43        | [-0.46; 1.32]        | 17.3%         |
| 1.72        | [ 0.72; 2.73]        | 15.9%         |
| 0.02        | [-0.27; 0.30]        | 23.7%         |
| -0.20       | [-0.68; 0.27]        | 22.0%         |
| <b>0.52</b> | <b>[-0.42; 1.47]</b> | <b>100.0%</b> |

## ORBITAL VOLUME

| Study                       | Conventional |      |        | PSI       |      |        |
|-----------------------------|--------------|------|--------|-----------|------|--------|
|                             | Total        | Mean | SD     | Total     | Mean | SD     |
| Guo et al                   | 26           | 0.92 | 0.7310 | 35        | 0.19 | 0.2000 |
| Scolozzi et al              | 10           | 0.26 | 1.0716 | 10        | 0.08 | 1.5682 |
| Sigron et al                | 12           | 1.60 | 1.2000 | 10        | 1.00 | 0.7000 |
| <b>Random effects model</b> | <b>48</b>    |      |        | <b>55</b> |      |        |

Heterogeneity:  $I^2 = 71\%$ ,  $t^2 = 0.3059$ ,  $p = 0.03$   
 Test for overall effect:  $t_2 = 1.97$  ( $p = 0.19$ )

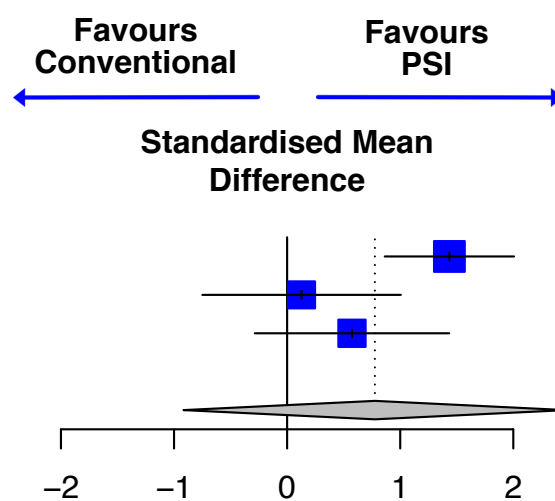

| SMD         | 95%–CI               | Weight        |
|-------------|----------------------|---------------|
| 1.43        | [ 0.86; 2.01]        | 39.1%         |
| 0.13        | [-0.75; 1.01]        | 30.2%         |
| 0.57        | [-0.29; 1.43]        | 30.7%         |
| <b>0.78</b> | <b>[-0.92; 2.47]</b> | <b>100.0%</b> |
