# Supplementary material for: Orbital reconstruction: a systematic review and meta-analysis evaluating the role of patient-specific implants
Source: Springer Nature journal article supplement (doi:10.1007/s10006-022-01074-x), 2022-05-20
Supplement: MOESM2 [file 22165596]

## SUPPLEMENTARY MATERIAL

### Search strategy for included databases

- ClinicalTrials.gov (n = 18)

1. Orbital Fracture

- Cochrane CENTRAL (n = 120)

1. Orbital Fracture

- EMBASE and MEDLINE (via OVID) (n = 356 and 1227, respectively)

1. exp Orbital Fractures/
2. exp Orbital Implants/
3. exp Maxillofacial Injuries/
4. exp Reconstructive Surgical Procedures/
5. orbital reconstruct\$.mp.
6. orbital fracture\$.mp.1W
7. 1 or 2 or 3 or 4 or 5 or 6
8. exp Surgery, Computer-Assisted/
9. exp Therapy, Computer-Assisted/
10. exp Diagnosis, Computer-Assisted/
11. exp Computer-Aided Design/
12. exp Stereolithography/
13. exp Computer Simulation/
14. exp Imaging, Three-Dimensional/
15. exp Tomography, X-Ray Computed/
16. preform\$.mp.
17. prefabricate\$.mp.
18. exp Stereotaxic Techniques/
19. exp Neuronavigation/
20. 8 or 9 or 10 or 11 or 12 or 13 or 14 or 15 or 16 or 17 or 18 or 19
21. exp Randomized Controlled Trial/
22. trial.ab.ti.
23. cohort.ab.ti.
24. 21 or 22 or 23
25. 7 and 20 and 24

- PubMed (n = 685)

1. (((((orbital fracture) OR (orbital implant)) OR (orbital reconstruction)) AND (((((((((((3D) OR (stereolithography)) OR (CT)) OR (computer-assisted)) OR (computer-aided)) OR (computer-guided)) OR (performed)) OR (prefabricated)) OR (3D imaging)) OR (stereotactic)) OR (stereotaxic)) OR (neuronavigation))) AND (((randomized controlled trial) OR (cohort)) OR (trial))

- Scopus (n = 1896)

1. (KEY(orbital AND fracture) OR KEY(orbital AND implant) OR KEY(orbital AND reconstruction) AND KEY(3D) OR KEY(computer-assisted) OR KEY(computer-aided) OR KEY(computer-guided) OR KEY(stereotactic) OR KEY(stereotaxic) OR KEY(stereolithography) OR KEY(CT) OR KEY(performed) OR KEY(prefabricated)

- WOSCC (n = 461)
  0. “TS=Orbit\* Fracture\*
  1. TS=Orbit\* Reconstruct\*
  2. TS=Orbit\* Implant\*
  3. TS=Maxillofacial Injuries
  4. 1 or 2 or 3 or 4
  5. TS=Computer-Aided
  6. TS=Computer-Guided
  7. TS=Computer-Assisted
  8. TS=3D
  9. TS=CT
  10. TS=Preformed
  11. TS=Prefabricated
  12. TS=Stereotactic
  13. TS=Stereotaxic
  14. TS=Neuronavigation
  15. 8 or 9 or 10 or 11 or 12 or 13 or 14 or 15
  16. TS=Randomized Controlled Trial
  17. TS=Trial
  18. TS=Cohort
  19. TS=Control
  20. TS=Groups
  21. 17 or 18 or 19 or 20 or 21
  22. 5 and 16 and 22”
  
- WHO ICTRP (n = 21)

1. “Orbital Fracture”
